# Supplementary material
Source: ML conference proceedings conference paper supplement (https://proceedings.neurips.cc/paper_files/paper/2019/hash/7b66b4fd401a271a1c7224027ce111bc-Abstract.html)

88-ddnnf

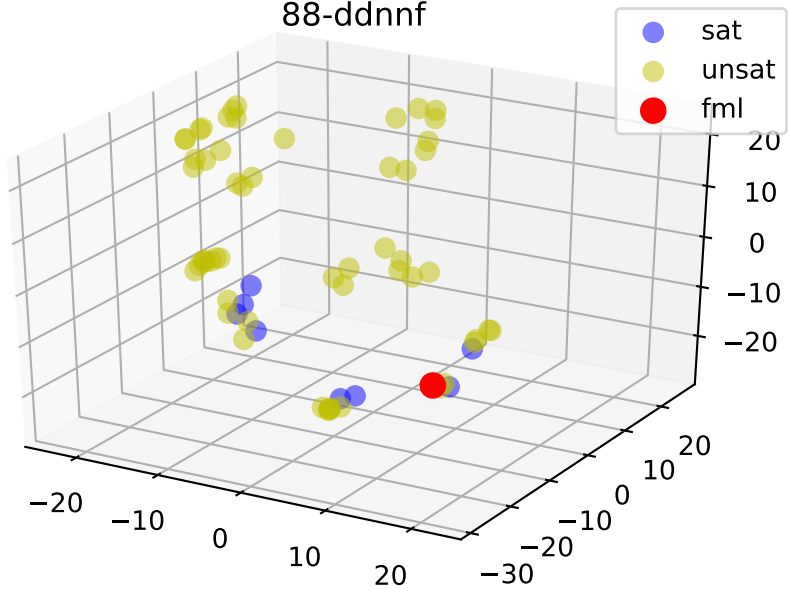

Supplement: Supplementary file [file 7b66b4fd401a271a1c7224027ce111bc-Supplemental.zip]
