# Supplementary material
Source: ML conference proceedings conference paper supplement (https://proceedings.neurips.cc/paper_files/paper/2019/hash/7b66b4fd401a271a1c7224027ce111bc-Abstract.html)
Supplement: Supplementary file [file 7b66b4fd401a271a1c7224027ce111bc-Supplemental.zip]

# 1 Supplementary Material

## 2 1.1 Embedder Training Algorithm

3 The algorithm for training the embedder is summarized in Algorithm 1.

---

### Algorithm 1 trainEmbedder

---

**Input:**  $f$ : CNF formula;  $I$ : Training images;  $m$ : Margin

**Output:**  $q$ : Embedder

```

1:  $q \leftarrow \text{init}()$ 
2: repeat
3:   for all  $I_i \in I$  do
4:     // Create intermediate formula
5:      $f_i \leftarrow \{ \}$ 
6:      $objs \leftarrow \text{all\_instances\_in}(I_i)$ 
7:     for all  $c_i \in f$  do
8:       if  $\text{all\_instances\_in}(c_i) \in objs$  then
9:          $f_i \leftarrow f_i \cup c_i$ 
10:      end if
11:    end for
12:     $f_i \leftarrow \text{append\_constraints}(f_i)$ 
13:     $\tau_T \leftarrow \text{sat\_assig\_of}(f_i)$ 
14:     $\tau_F \leftarrow \text{unsat\_assig\_of}(f_i)$ 
15:     $\Theta_q \leftarrow \underset{\Theta_q}{\text{argmin}} L_{emb}$ 
16:     $q \leftarrow \text{update\_with}(q, \Theta_q)$ 
17:  end for
18: until Convergence
19: return  $q$ 

```

---

## 4 1.2 Embeddable-Demanding

5 The significant performance improved due to usage of d-DNNF raises the question whether the  
6 language represented by d-DNNF has a smaller search space and therefore, potentially easier learning  
7 method. To this end, we introduce the concept of embeddable-demanding below

8 The following theorems uses the standard complexity theoretic terms and we refer to the reader to the  
9 standard text [11] for detailed treatment of these concepts.

10 **Definition 1 (Embeddable-Demanding)** Let  $L_1, L_2$  be two compilation languages.  $L_1$  is at least  
11 as embeddable-demanding as  $L_2$  iff there exists a polynomial  $p$  such that for every sentence  $\alpha \in$   
12  $L_2, \exists \beta \in L_1$  such that (i)  $|\beta| \leq p(|\alpha|)$ . Here  $|\alpha|, |\beta|$  are the sizes of  $\alpha, \beta$  respectively, and  $\beta$  may  
13 include auxiliary variables. (ii) The transformation from  $\alpha$  to  $\beta$  is poly time. (iii) There exists a  
14 bijection between models of  $\beta$  and models of  $\alpha$ .

15 **Theorem 1.1** CNF is at least as embeddable-demanding as d-DNNF but if d-DNNF is at least as  
16 embeddable-demanding as CNF then  $P = PP$

17 **Proof 1.1** (1) Prove that CNF is at least as embeddable-demanding as d-DNNF, i.e. for every formula  
18  $\alpha$  in d-DNNF, there exists a polynomial size, and polynomial time computable CNF formula  $\beta$  such  
19 that there is an one to one polynomial time computable mapping between models of  $\beta$  to  $\alpha$ .

20 Observe that d-DNNF represents a circuit, which can be encoded into an equisatisfiable CNF formula  
21 of polynomial size due to NP-completeness of CNF. In particular, the usage of Tseytin encoding [2]  
22 ensures that the resulting CNF is of linear size. Furthermore, let d-DNNF  $G$  be defined over the set  
23 of variables denoted by  $X$ , then Tseytin encoding introduces a set of auxiliary variables, say  $Y$ , for  
24 the resulting formula  $F$  such that  $G(X) = \exists Y F(X \cup Y)$ . Therefore, the mapping from models of  $G$   
25 to  $F$  is achieved just by projection of models of  $G$  on  $X$ .

26 (2) Prove that if  $d$ -DNNF is at least as embeddable-demanding as CNF then  $P = PP$ . In other  
 27 words, if for every formula  $\beta$  in CNF, there exists a polynomial size, and polynomial time computable  
 28  $d$ -DNNF  $\alpha$  such that there is bijection between models of  $\alpha$  and models of  $\beta$ , then  $P = PP$ .  $P = PP$   
 29 implies collapse of entire polynomial hierarchy, in particular  $P = NP$ .

30 Assume for every formula  $\beta$  in CNF, there exists a polynomial size, and polynomial time computable  
 31  $d$ -DNNF  $\alpha$  such that there is a bijection between models of  $\alpha$  and models of  $\beta$ . Since  $d$ -DNNF allows  
 32 counting in polynomial time and the existence of bijection implies that the number of models of  $\alpha$   
 33 is equal to that of  $\beta$ , then we can compute the number of models of an arbitrary CNF formula in  
 34 polynomial time; therefore  $P = PP$ . In this context, it is worth noting that the entire polynomial  
 35 polynomial hierarchy is shown to contain  $PP$ , i.e.,  $PH \subseteq PP$  [3].

### 36 1.3 Computing Infrastructure

37 We trained our models using Pytorch 0.4.1 on one NVIDIA GTX 1080 Ti 12GB GPU.

### 38 1.4 Hyper-parameters Selection

39 Our hyper-parameters includes: the margin in triplet loss of the embedder  $m$ , the semantic regularizer  
 40 weight  $\lambda_r$  and logic loss weight  $\lambda$ . The ranges considered are  $[0.5, 5]$  for  $m$ ;  $[0.05, 0.2]$  for  $\lambda_r$  and  
 41  $[0.05, 0.2]$  for  $\lambda$ . We did grid search and set  $m = 1.0$ ,  $\lambda_r = 0.1$ ,  $\lambda = 0.1$  across all experiments.

### 42 References

- 43 [1] S. Arora and B. Barak, *Computational complexity: a modern approach*. Cambridge University  
 44 Press, 2009.
- 45 [2] G. S. Tseytin, *On the Complexity of Derivation in Propositional Calculus*, pp. 466–483. Berlin,  
 46 Heidelberg: Springer Berlin Heidelberg, 1983.
- 47 [3] S. Toda, “Pp is as hard as the polynomial-time hierarchy,” *SIAM Journal on Computing*, vol. 20,  
 48 no. 5, pp. 865–877, 1991.
